# Supplementary material for: Author Correction: Culex pipiens crossing type diversity is governed by an amplified and polymorphic operon of Wolbachia
Source: PubMed Central journal article supplement (PMC5895800; doi:10.1038/s41467-018-03799-4), 2018-04-11

**Supplementary Figure 1.** Unprocessed gel image of double digestion with Apo1 and Hpy188I of a 778 bp fragment of *cidA* gene which was amplified with primers 1/13 related to Figure 7c.

**a.** Unprocessed gel image of the left electrophoresis gel of the Figure 7c.

**b.** Unprocessed gel image of the right electrophoresis gel of the Figure 7c.

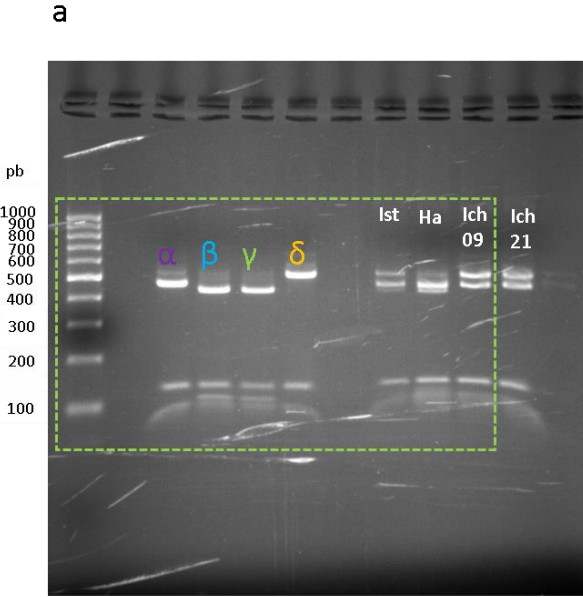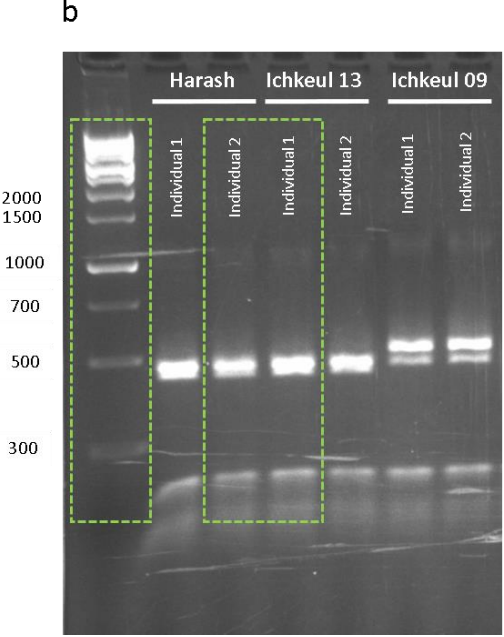

**Supplementary Figure 2.** Unprocessed gel image of double digestion with Apo1 and Hpy188I of a 778 bp fragment of *cidA* with the line Istanbul, Harash, Ichkeul 13 and Ichkeul 09 ran on the same electrophoresis gel related to Figure 7c.

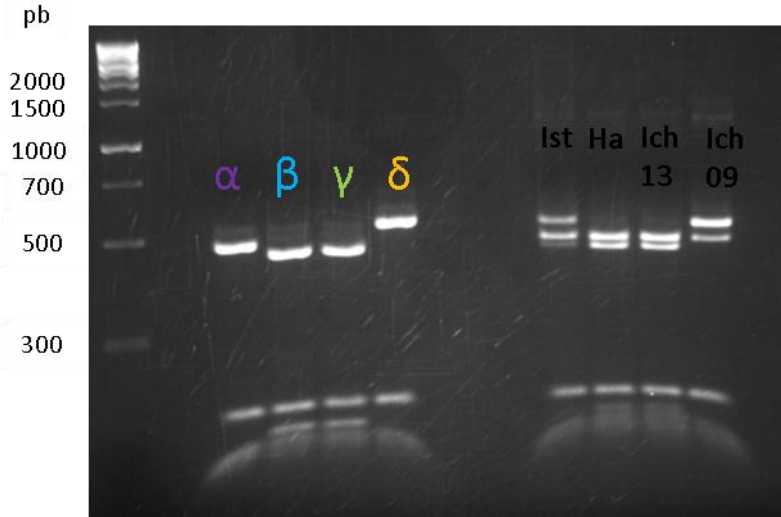

**Supplementary Figure 3.** Unprocessed gel image of double digestion with Taqa1 and Ban1 of a 1267–1276 bp fragment of *cidB* gene which was amplified with primers 7/8 related to Figure 8c.

**a.** Unprocessed gel image of the left electrophoresis gel of the Figure 8c.

**b.** Unprocessed gel image of the right electrophoresis gel of the Figure 8c.

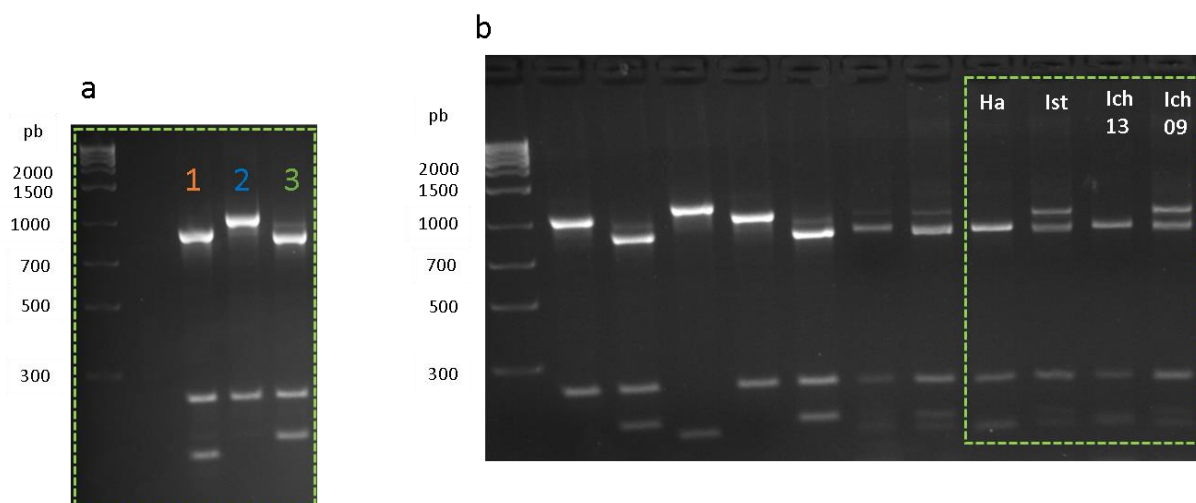

Supplement: 41467_2018_3799_MOESM1_ESM.pdf [file 41467_2018_3799_MOESM1_ESM.pdf]
